# Supplementary material for: Greener Synthesis of Pristane by Flow Dehydrative Hydrogenation of Allylic Alcohol Using a Packed-Bed Reactor Charged by Pd/C as a Single Catalyst
Source: MDPI journal article supplement (doi:10.3390/molecules26195845), 2021-09-27

## Supporting Information

### **Greener Synthesis of Pristane by Flow-Dehydration-Hydrogenation of Allylic Alcohol Using a Packed-Bed Reactor Charged by Pd/C as a Single Catalyst**

**Takayoshi Kasakado,<sup>1</sup> Yuki Hirobe,<sup>2</sup> Akihiro Furuta,<sup>2</sup> Mamoru Hyodo,<sup>1</sup> Takahide Fukuyama,<sup>2,\*</sup> and Ilhyong Ryu<sup>1,3\*</sup>**

<sup>1</sup> Organization for Research Promotion, Osaka Prefecture University, Sakai, Osaka 599-8531, Japan

<sup>2</sup> Department of Chemistry, Osaka Prefecture University, Sakai, Osaka 599-8531, Japan

<sup>3</sup> Department of Applied Chemistry, National Yang Ming Chiao Tung University (NYCU), Hsinchu 30010, Taiwan

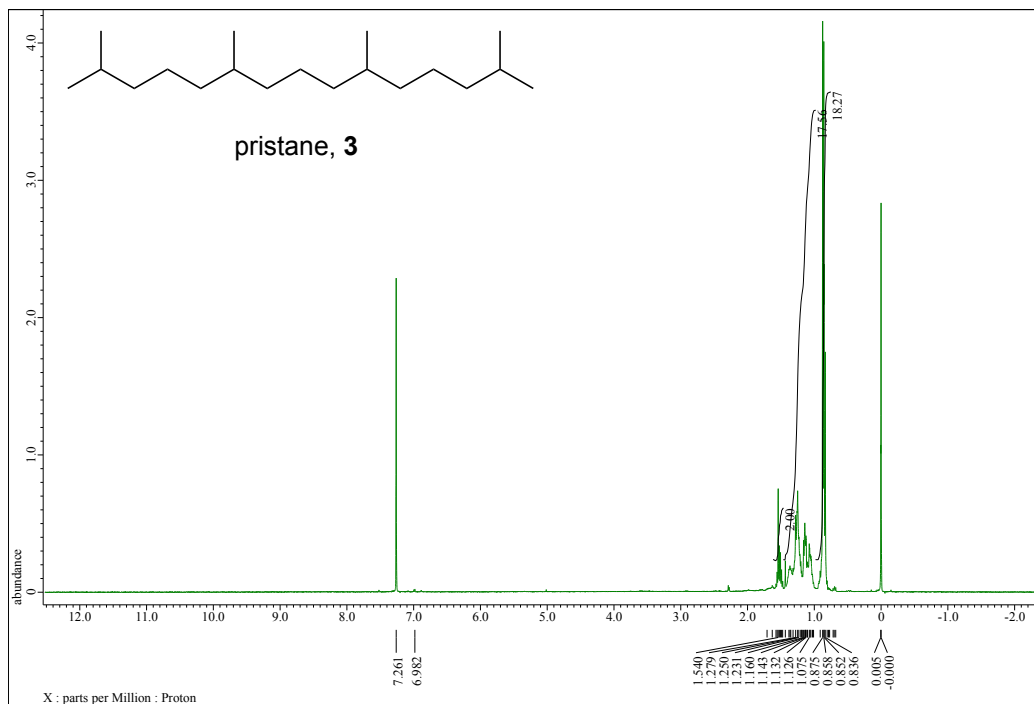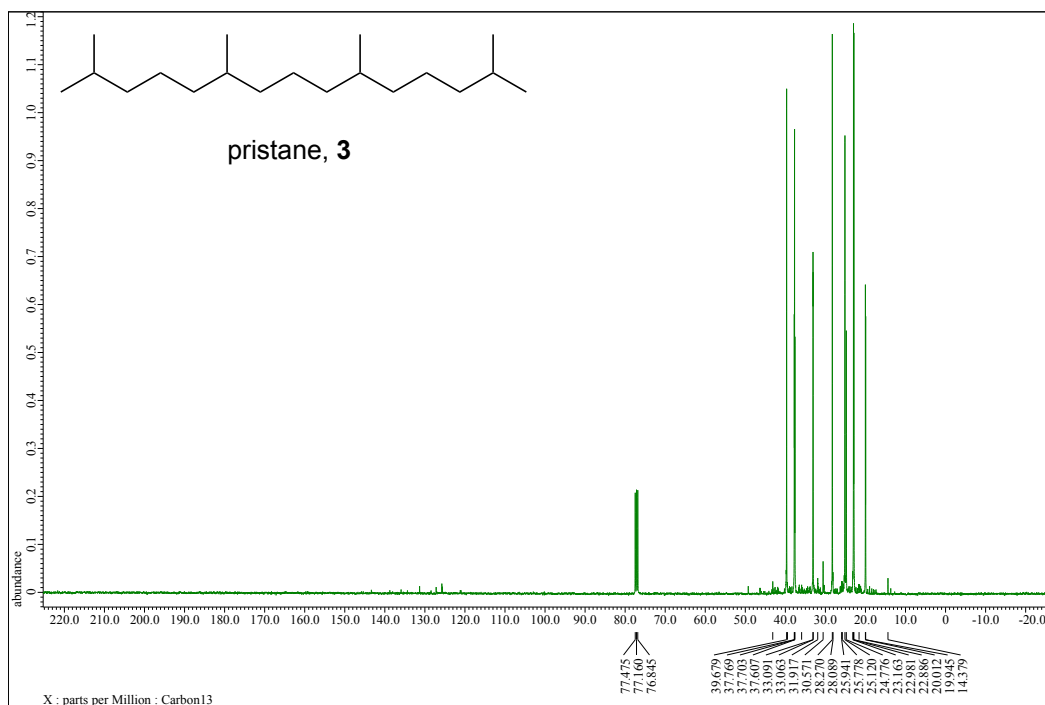

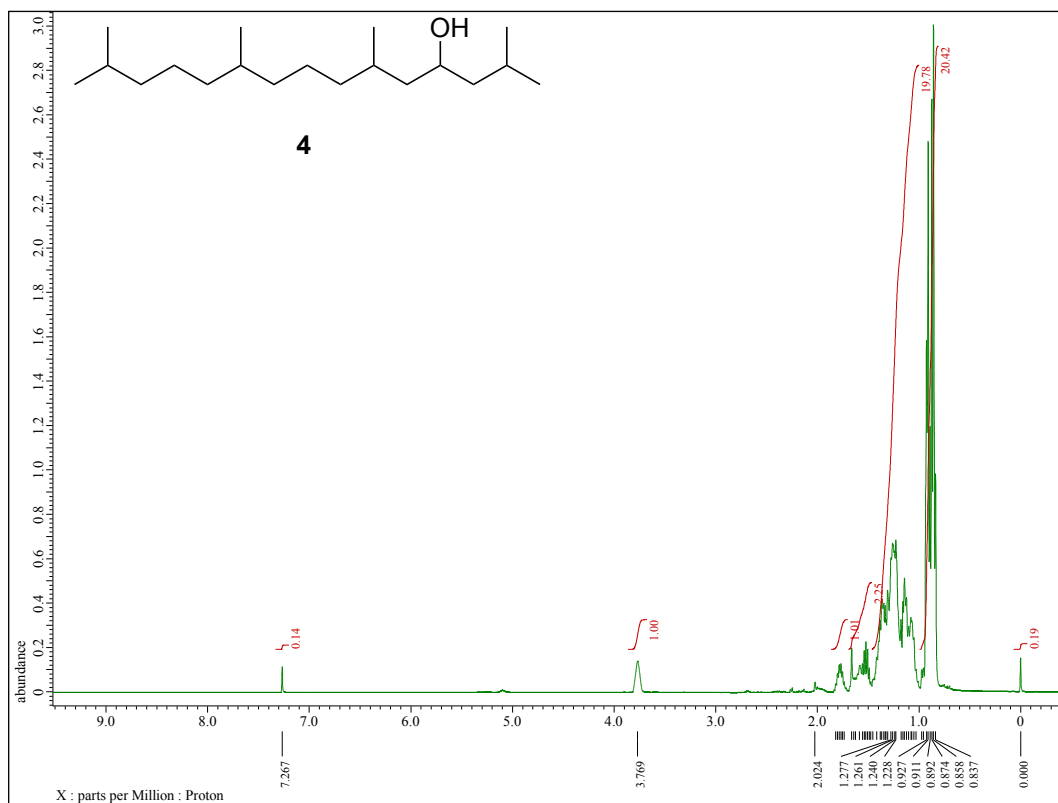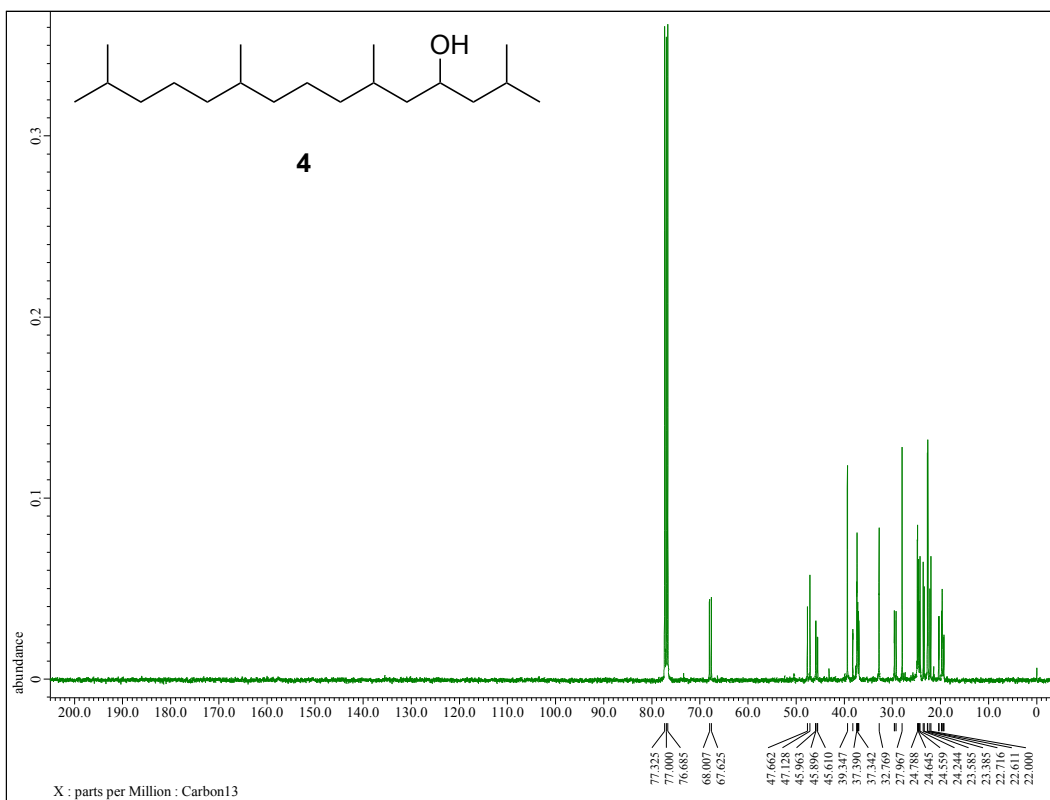

Supplement: s1 [file s1]
